# Supplementary material for: The Association between Diet and Sleep Quality among Spanish University Students
Source: MDPI journal article supplement (doi:10.3390/nu14163291), 2022-08-11
Supplement: s1 [file s1]

**Supplementary Table S1.** Criteria for scoring the Spanish Healthy Eating Index (SHEI)<sup>1</sup>.

| Category                      | Criteria for a score of 10*                                                                                                                  | Criteria for a score of 7.5          | Criteria for a score of 5 | Criteria for a score of 2.5          | Criteria for a score of 0 |
|-------------------------------|----------------------------------------------------------------------------------------------------------------------------------------------|--------------------------------------|---------------------------|--------------------------------------|---------------------------|
| <b>Bread and grains</b>       | Consumed daily                                                                                                                               | 3 or more times a week but not daily | Once or twice a week      | Less than once a week                | Never or very rarely      |
| <b>Vegetables</b>             | Consumed daily                                                                                                                               | 3 or more times a week but not daily | Once or twice a week      | Less than once a week                | Never or very rarely      |
| <b>Fruits</b>                 | Consumed daily                                                                                                                               | 3 or more times a week but not daily | Once or twice a week      | Less than once a week                | Never or very rarely      |
| <b>Dairy products</b>         | Consumed daily                                                                                                                               | 3 or more times a week but not daily | Once or twice a week      | Less than once a week                | Never or very rarely      |
| <b>Meat</b>                   | Once or twice a week                                                                                                                         | 3 or more times a week but not daily | Less than once a week     | Consumed daily                       | Never or very rarely      |
| <b>Legumes</b>                | Once or twice a week                                                                                                                         | 3 or more times a week but not daily | Less than once a week     | Consumed daily                       | Never or very rarely      |
| <b>Cold meats and cuts</b>    | Never or very rarely                                                                                                                         | Less than once a week                | Once or twice a week      | 3 or more times a week but not daily | Consumed daily            |
| <b>Sweets</b>                 | Never or very rarely                                                                                                                         | Less than once a week                | Once or twice a week      | 3 or more times a week but not daily | Consumed daily            |
| <b>Soft drinks with sugar</b> | Never or very rarely                                                                                                                         | Less than once a week                | Once or twice a week      | 3 or more times a week but not daily | Consumed daily            |
| <b>Variety of diet</b>        | 1 point if the participant completes each of the weekly recommendations and two points if the participant each of the daily recommendations. |                                      |                           |                                      |                           |

\*A score of 10 in a particular category means that the participant's habits are aligned with the frequency recommendations for food consumption provided by the Spanish Society for Community Nutrition<sup>2</sup>.

## References

- (1) Norte Navarro, A. I.; Ortiz Moncada, R. [Spanish diet quality according to the healthy eating index]. *Nutr. Hosp.* **2011**, 26 (2), 330–336. <https://doi.org/10.1590/S0212-16112011000200014>.
- (2) Grupo Colaborativo de la Sociedad Española de Nutrición Comunitaria (SENC; Aranceta Bartrina, J.; Arijalva, V.; Maíz Aldalur, E.; Martínez de la Victoria Muñoz, E.; Ortega Anta, R. M.; Pérez-Rodrigo, C.; Quiles Izquierdo, J.; Rodríguez Martín, A.; Román Viñas, B.; Salvador Castell, G.; Tur Marí, J. A.; Varela Moreiras, G.; Serra Majem, L. Dietary guidelines for the Spanish population (SENC, December 2016); the new graphic icon of healthy nutrition. *Nutr. Hosp.* **2016**, 33 (Suppl 8), 1–48. <https://doi.org/10.20960/nh.827>.
